# Supplementary material for: Association of Smoking with Metabolic Volatile Organic Compounds in Exhaled Breath
Source: PubMed Central journal article supplement (PMC5713205; doi:10.3390/ijms18112235), 2017-10-25
Supplement: ijms-18-02235-s001.pdf [file ijms-18-02235-s001.pdf]

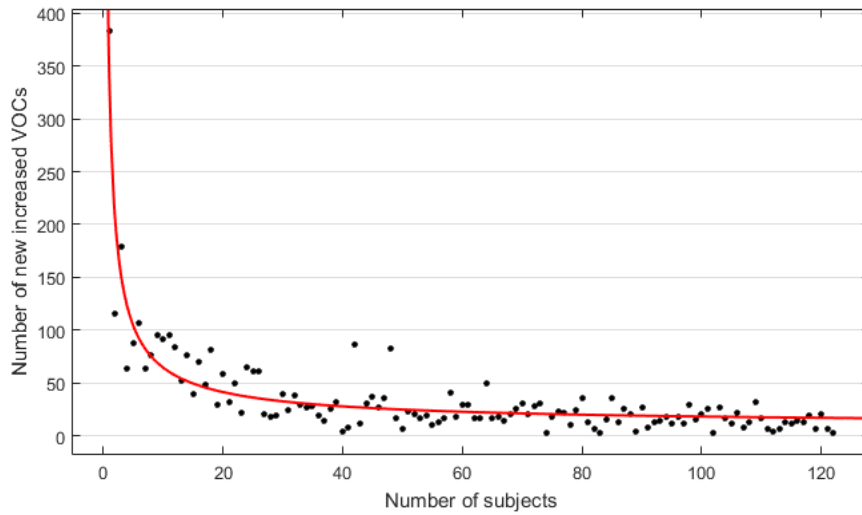

Figure S1. A downward trend of number of new identified VOCs.

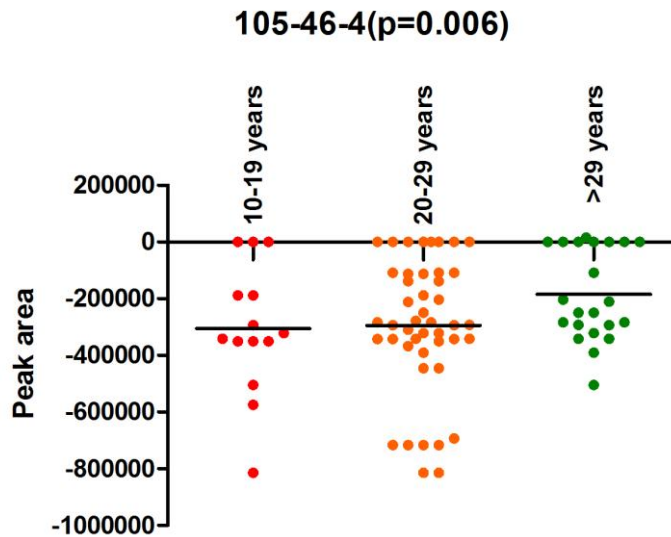

Figure S2. The VOC was strong correlated with years of smoking.

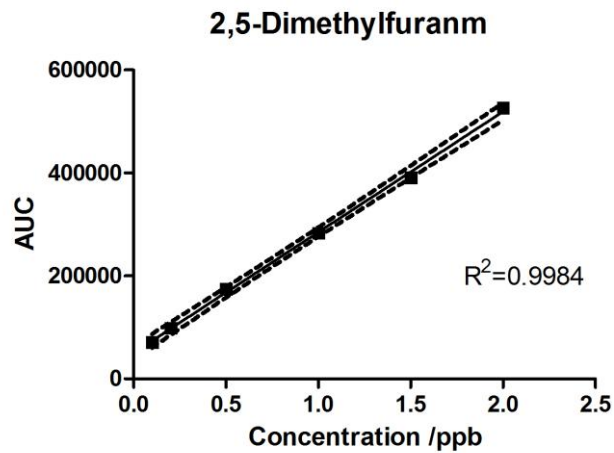

Figure S3. The results of calibration.

**Table S1.** The means of VOCs associated with smoking status.

| CAS No.      | VOCs                          | SS | Number of Participants | <i>p</i> -Value |
|--------------|-------------------------------|----|------------------------|-----------------|
| 111-84-2 *   | Nonane                        | 1  | 41                     | 0.047           |
|              |                               | 2  | 5                      |                 |
|              |                               | 3  | 4                      |                 |
|              |                               | 4  | 72                     |                 |
| 465-24-7 *   | Longiborneol                  | 1  | 41                     | 0.022           |
|              |                               | 2  | 5                      |                 |
|              |                               | 3  | 4                      |                 |
|              |                               | 4  | 72                     |                 |
| 112-39-0 *   | Methyl hexadecanoate          | 1  | 41                     | 0.033           |
|              |                               | 2  | 5                      |                 |
|              |                               | 3  | 4                      |                 |
|              |                               | 4  | 72                     |                 |
| 3075-84-1 *  | 2,2',5,5'-Tetramethylbiphenyl | 1  | 41                     | 0.04            |
|              |                               | 2  | 5                      |                 |
|              |                               | 3  | 4                      |                 |
|              |                               | 4  | 72                     |                 |
| 625-86-5 **  | 2,5-Dimethylfuran             | 1  | 41                     | <0.001          |
|              |                               | 2  | 5                      |                 |
|              |                               | 3  | 4                      |                 |
|              |                               | 4  | 72                     |                 |
| 2612-46-6 ** | <i>cis</i> -1,3,5-Hexatriene  | 1  | 41                     | 0.002           |
|              |                               | 2  | 5                      |                 |
|              |                               | 3  | 4                      |                 |
|              |                               | 4  | 72                     |                 |
| 14676-29-0 * | 3-Ethyl-2-methylheptane       | 1  | 41                     | 0.032           |
|              |                               | 2  | 5                      |                 |
|              |                               | 3  | 4                      |                 |
|              |                               | 4  | 72                     |                 |

\*  $p < 0.05$ , \*\*  $p < 0.01$ . SS: smoking status: never, former, former that quit less than 1 year, and current are signed as 1, 2, 3, and 4, respectively.

**Table S2.** The means of VOCs associated with smoking intensity.

| <b>CAS No.</b>      | <b>VOCs</b>        | <b>SI</b> | <b>Number of Participants</b> | <b><i>p</i>-Value</b> |
|---------------------|--------------------|-----------|-------------------------------|-----------------------|
| <b>123-86-4 *</b>   | Butyl acetate      | 1         | 53                            | 0.035                 |
|                     |                    | 2         | 22                            |                       |
|                     |                    | 3         | 6                             |                       |
| <b>100-41-4 *</b>   | Ethylbenzene       | 1         | 53                            | 0.043                 |
|                     |                    | 2         | 22                            |                       |
|                     |                    | 3         | 6                             |                       |
| <b>620-14-4 *</b>   | 3-Ethyltoluene     | 1         | 53                            | 0.046                 |
|                     |                    | 2         | 22                            |                       |
|                     |                    | 3         | 6                             |                       |
| <b>112-31-2 **</b>  | Decanal            | 1         | 53                            | 0.005                 |
|                     |                    | 2         | 22                            |                       |
|                     |                    | 3         | 6                             |                       |
| <b>138-86-3 *</b>   | Cinene             | 1         | 53                            | 0.026                 |
|                     |                    | 2         | 22                            |                       |
|                     |                    | 3         | 6                             |                       |
| <b>98-83-9 *</b>    | 2-Phenyl-1-propene | 1         | 53                            | 0.026                 |
|                     |                    | 2         | 22                            |                       |
|                     |                    | 3         | 6                             |                       |
| <b>17671-27-1 *</b> | Behenyl behenate   | 1         | 53                            | 0.04                  |
|                     |                    | 2         | 22                            |                       |
|                     |                    | 3         | 6                             |                       |

\*  $p < 0.05$ , \*\*  $p < 0.01$ . SI: smoking intensity. 1: 1–20 cigarettes per day, 2: 21–40 cigarettes per day, 3: 41–60 cigarettes per day.

**Table S3.** The means of VOCs associated with years of smoking.

| CAS No.       | VOCs                                             | YS | Number of Participants | <i>p</i> -Value |
|---------------|--------------------------------------------------|----|------------------------|-----------------|
| 111-84-2 *    | N-Nonane                                         | 1  | 14                     | 0.028           |
|               |                                                  | 2  | 45                     |                 |
|               |                                                  | 3  | 22                     |                 |
| 19549-87-2 ** | 2,4-Dimethyl-1-heptene                           | 1  | 14                     | 0.001           |
|               |                                                  | 2  | 45                     |                 |
|               |                                                  | 3  | 22                     |                 |
| 105-46-4 **   | DL-sec-Butyl acetate                             | 1  | 14                     | 0.006           |
|               |                                                  | 2  | 45                     |                 |
|               |                                                  | 3  | 22                     |                 |
| 589-81-1 *    | 3-Methylheptane                                  | 1  | 14                     | 0.014           |
|               |                                                  | 2  | 45                     |                 |
|               |                                                  | 3  | 22                     |                 |
| 3074-71-3 **  | 2,3-Dimethylheptane                              | 1  | 14                     | 0.001           |
|               |                                                  | 2  | 45                     |                 |
|               |                                                  | 3  | 22                     |                 |
| 17312-77-5 *  | 2,3-dimethylundecane                             | 1  | 14                     | 0.013           |
|               |                                                  | 2  | 45                     |                 |
|               |                                                  | 3  | 22                     |                 |
| 2492-18-4 *   | Hexanoic acid, 1,1-dimethylethyl ester           | 1  | 14                     | 0.049           |
|               |                                                  | 2  | 45                     |                 |
|               |                                                  | 3  | 22                     |                 |
| 17302-37-3 *  | 2,2-Dimethyldecane                               | 1  | 14                     | 0.011           |
|               |                                                  | 2  | 45                     |                 |
|               |                                                  | 3  | 22                     |                 |
| 16397-79-8 *  | Acetic acid,2,2,2-trichloro-, 2-ethylhexyl ester | 1  | 14                     | 0.01            |
|               |                                                  | 2  | 45                     |                 |
|               |                                                  | 3  | 22                     |                 |
| 2216-34-4 **  | 4-Methyloctane                                   | 1  | 14                     | 0.001           |
|               |                                                  | 2  | 45                     |                 |
|               |                                                  | 3  | 22                     |                 |
| 79-01-6 *     | Trichloroethylene                                | 1  | 14                     | 0.021           |
|               |                                                  | 2  | 45                     |                 |
|               |                                                  | 3  | 22                     |                 |

\*  $p < 0.05$ , \*\*  $p < 0.01$ . YS: years of smoking years of smoking. 1: 10–19 years, 2: 20–29 years, 3: >29 years.

**Table S4.** The means of VOCs associated with depth of smoke inhalation.

| CAS No.       | VOCs                                                                                              | DS | Number of Participants | <i>p</i> -Value |
|---------------|---------------------------------------------------------------------------------------------------|----|------------------------|-----------------|
| 111-84-2 *    | n-Nonane                                                                                          | 1  | 27                     | 0.013           |
|               |                                                                                                   | 2  | 42                     |                 |
|               |                                                                                                   | 3  | 11                     |                 |
| 98-86-2 *     | Acetophenone                                                                                      | 1  | 27                     | 0.027           |
|               |                                                                                                   | 2  | 42                     |                 |
|               |                                                                                                   | 3  | 11                     |                 |
| 112-31-2 *    | Decyl aldehyde                                                                                    | 1  | 27                     | 0.042           |
|               |                                                                                                   | 2  | 42                     |                 |
|               |                                                                                                   | 3  | 11                     |                 |
| 24959-83-9 *  | 2,4-Methano-1H-indene,octahydro-7a-methyl-1-methylene-5-(1-methylethyl)-, (2R,3aR,4R,5S,7aS)-rel- | 1  | 27                     | 0.042           |
|               |                                                                                                   | 2  | 42                     |                 |
|               |                                                                                                   | 3  | 11                     |                 |
| 719-22-2 *    | 2,6-Di-tert-butylcyclohexa-2,5-diene-1,4-dione                                                    | 1  | 27                     | 0.042           |
|               |                                                                                                   | 2  | 42                     |                 |
|               |                                                                                                   | 3  | 11                     |                 |
| 3892-00-0 *   | 2,6,10-Trimethylpentadecane                                                                       | 1  | 27                     | 0.049           |
|               |                                                                                                   | 2  | 42                     |                 |
|               |                                                                                                   | 3  | 11                     |                 |
| 17302-01-1 *  | 3-Ethyl-3-methylheptane                                                                           | 1  | 27                     | 0.049           |
|               |                                                                                                   | 2  | 42                     |                 |
|               |                                                                                                   | 3  | 11                     |                 |
| 2051-30-1 *   | 2,6-Dimethyloctane                                                                                | 1  | 27                     | 0.033           |
|               |                                                                                                   | 2  | 42                     |                 |
|               |                                                                                                   | 3  | 11                     |                 |
| 83704-03-4 *  | Heptane,3-[(1,1-dimethylethoxy)methyl]-                                                           | 1  | 27                     | 0.02            |
|               |                                                                                                   | 2  | 42                     |                 |
|               |                                                                                                   | 3  | 11                     |                 |
| 92-52-4 *     | Biphenyl                                                                                          | 1  | 27                     | 0.027           |
|               |                                                                                                   | 2  | 42                     |                 |
|               |                                                                                                   | 3  | 11                     |                 |
| 4443-59-8 *   | 5-Cyclohexylicosane                                                                               | 1  | 27                     | 0.044           |
|               |                                                                                                   | 2  | 42                     |                 |
|               |                                                                                                   | 3  | 11                     |                 |
| 62183-79-3 ** | 2,2,4,4-Tetramethyloctane                                                                         | 1  | 27                     | 0.001           |
|               |                                                                                                   | 2  | 42                     |                 |
|               |                                                                                                   | 3  | 11                     |                 |
| 111-66-0 *    | 1-Octene                                                                                          | 1  | 27                     | 0.02            |
|               |                                                                                                   | 2  | 42                     |                 |
|               |                                                                                                   | 3  | 11                     |                 |
| 625-86-5 *    | 2,5-Dimethylfuran                                                                                 | 1  | 27                     | 0.01            |
|               |                                                                                                   | 2  | 42                     |                 |
|               |                                                                                                   | 3  | 11                     |                 |
| 2612-46-6 **  | 1,3,5-Hexatriene, (3Z)-                                                                           | 1  | 27                     | 0.001           |
|               |                                                                                                   | 2  | 42                     |                 |

|              |                         |   |    |       |
|--------------|-------------------------|---|----|-------|
|              |                         | 3 | 11 |       |
| 51655-64-2 * | 3-Methylene-nonane      | 1 | 27 | 0.033 |
|              |                         | 2 | 42 |       |
|              |                         | 3 | 11 |       |
| 1002-43-3 ** | 3-Methylundecane        | 1 | 27 | 0.008 |
|              |                         | 2 | 42 |       |
|              |                         | 3 | 11 |       |
| 1067-20-5 *  | 3,3-Diethylpentane      | 1 | 27 | 0.014 |
|              |                         | 2 | 42 |       |
|              |                         | 3 | 11 |       |
| 108-95-2 *   | Phenol                  | 1 | 27 | 0.02  |
|              |                         | 2 | 42 |       |
|              |                         | 3 | 11 |       |
| 13287-21-3 * | 6-Methyltridecane       | 1 | 27 | 0.043 |
|              |                         | 2 | 42 |       |
|              |                         | 3 | 11 |       |
| 17302-27-1 * | 2,5-Dimethylnonane      | 1 | 27 | 0.037 |
|              |                         | 2 | 42 |       |
|              |                         | 3 | 11 |       |
| 571-61-9 *   | 1,5-Dimethylnaphthalene | 1 | 27 | 0.049 |
|              |                         | 2 | 42 |       |
|              |                         | 3 | 11 |       |
| 17301-28-9 * | 3,6-Dimethylundecane    | 1 | 27 | 0.033 |
|              |                         | 2 | 42 |       |
|              |                         | 3 | 11 |       |
| 124-18-5 *   | Decane                  | 1 | 27 | 0.031 |
|              |                         | 2 | 42 |       |
|              |                         | 3 | 11 |       |
| 7146-60-3 *  | 2,3-Dimethyloctane      | 1 | 27 | 0.015 |
|              |                         | 2 | 42 |       |
|              |                         | 3 | 11 |       |
| 17301-24-5 * | 2,7-Dimethylundecane    | 1 | 27 | 0.033 |
|              |                         | 2 | 42 |       |
|              |                         | 3 | 11 |       |
| 71138-64-2 * | 3-Methyleneundecane     | 1 | 27 | 0.03  |
|              |                         | 2 | 42 |       |
|              |                         | 3 | 11 |       |

\*  $p < 0.05$ , \*\*  $p < 0.01$ . DS: depth of smoke inhalation. 1: inhale into lung, 2: only inhale into mouth, and throat, 3: non-inhale.

**Table S5.** Correlations between VOCs and “engine oil” reported.

| CAS No.   | VOCs                            | <i>p</i> -Value |
|-----------|---------------------------------|-----------------|
| 95-47-6   | 1,2-Dimethylbenzene             | 0.042           |
| 1120-21-4 | n-Hendecane                     | 0.004           |
| 620-14-4  | 1-ethyl-3-methyl-Benzene        | 0.028           |
| 294-62-2  | Cyclododecane                   | <0.001          |
| 77-53-2   | Cedrol                          | <0.001          |
| 123-51-3  | 1-Hydroxy-3-methylbutane        | 0.014           |
| 2958-76-1 | Naphthalene,decahydro-2-methyl- | <0.001          |

**Table S6.** Correlations between VOCs and “automobile exhaust” reported.

| <b>CAS No.</b> | <b>VOCs</b>                             | <b><i>p</i>-Value</b> |
|----------------|-----------------------------------------|-----------------------|
| 95-47-6        | 1,2-Dimethylbenzene                     | 0.030                 |
| 13475-82-6     | 2,2,4,6,6-pentamethyl-Heptane           | <0.001                |
| 80-56-8        | 2,6,6-Trimethylbicyclo[3.1.1]hept-2-ene | 0.013                 |
| 88-18-6        | 2-tert-Butyl-1-hydroxybenzene           | 0.058                 |
| 535-77-3       | 1-methyl-3-(1-methylethyl)-benzen       | 0.023                 |
| 2958-76-1      | Naphthalene,decahydro-2-methyl-         | 0.031                 |
